# Supplementary material for: Biallelic mutations in calcium release activated channel regulator 2A (CRACR2A) cause a primary immunodeficiency disorder
Source: eLife journal article supplement (doi:10.7554/elife.72559), 2021-12-06
Supplement: supp2 [file ELISA Values for Fig3C.xlsx]

## Sheet: ELISA values
IgM secretion (ng/ml)
	Day of culture
Donor	13	20
Patient	65309	30449
HC1	36118	13627
HC2	49091.5	27181.5
HC3	91120.5	21676.5
HC4	55024	15037.5
HC5	58785.5	25102.5
IgG secretion (ng/ml)
	Day of culture
Donor	13	20
Patient	8230	4009
HC1	12744	8199
HC2	7020.7	5909.1
HC3	2962.1	1751.3
HC4	10392.4	6643.5
HC5	7454.7	5355.5
