# Supplementary material for: Biallelic mutations in calcium release activated channel regulator 2A (CRACR2A) cause a primary immunodeficiency disorder
Source: eLife journal article supplement (doi:10.7554/elife.72559), 2021-12-06
Supplement: supp2 [file Figure 1_figure_supplement_1_TH1_Th2_Th17.xlsx]

## Sheet: Sheet1
	TH1 %	TH2 %	TH17 %
Controls	29.7	31.5	17.7
	39.5	32.5	13.1
	18.9	54.7	12.9
	18.9	49.3	11
	25	45.4	12.6
	14.7	56.2	15.4
Patient	36.4	14.8	13.1
	37	15.9	13
