# Supplementary material for: Biallelic mutations in calcium release activated channel regulator 2A (CRACR2A) cause a primary immunodeficiency disorder
Source: eLife journal article supplement (doi:10.7554/elife.72559), 2021-12-06
Supplement: supp2 [file Figure 4_Figure supplemnet1_ORAI1STIM1qPCR.xlsx]

## Sheet: Sheet3
		36B4	Healthy Control (HC)	Patient (Pt)
16.777			16.777	18.5073
16.7171			16.7171	18.6818
16.8935			16.8935	18.5082
18.5073
18.6818		AVE	16.7959	18.5658
18.5082			16.7959	18.5658
23.022			16.7959	18.5658
22.8802			HC	Pt			HC	Pt
22.9477		orai1	23.022	24.5176		stim1	24.8996	25.9242
24.5176			22.8802	24.6878			24.4515	26.6779
24.6878			22.9477	24.4441			24.1025	26.2122
24.4441
24.8996			6.22612	5.95177			8.10372	7.35844
24.4515			6.08433	6.12206			7.65559	8.11214
24.1025			6.15179	5.87829			7.30657	7.64637
25.9242
26.6779			0.0133583	0.0161561			0.00363528	0.00609381
26.2122			0.0147378	0.0143574			0.00495952	0.00361411
			0.0140646	0.0170004			0.00631689	0.00499128
			0.0140536				0.00497056
			0.954162	1.15401			0.731444	1.22612
			1.0527	1.02553			0.99789	0.727185
			1.00462	1.21432			1.271	1.00428
		orai1	HC	Pt		stim1	HC	Pt
		ave	1.00383	1.13128			1.00011	0.985862
		sd	0.0492746	0.0964231			0.269787	0.249976
		se	0.0284487	0.0556699			0.155761	0.144324
		ttest		0.1111				0.949713
