# Supplementary material for: Biallelic mutations in calcium release activated channel regulator 2A (CRACR2A) cause a primary immunodeficiency disorder
Source: eLife journal article supplement (doi:10.7554/elife.72559), 2021-12-06
Supplement: supp2 [file Figure_1_PHA_anti-CD3 data_Figure 1_C_and _D.xlsx]

## Sheet: Sheet1
	PHA 5 mico/ml	10	100
Control	88666	102084	25642	units CMP
	119112	152745	150043
	22237	28175	70723
Patient	38295	33330	20008
	91642	85564	31095
	2300	3620	27152
Anti-CD3	Control	Patient
	161025	45778	units CMP
	179969	24462
	96277	66780
	100912	53519
